# Supplementary material
Source: MDPI journal article supplement (https://www.mdpi.com/2312-7481/9/6/154)
Supplement: s1 [file s1]

# Magneto-structural Analysis of Hydroxido-bridged Cu<sup>II</sup><sub>2</sub> Complexes: Density Functional Theory and other Treatments

Debpriyo Goswami, Shanti Gopal Patra\*, Debashis Ray\*

<sup>1</sup>Department of Chemistry, Indian Institute of Technology, Kharagpur 721302, India

\*Email: [patrashantigopal@gmail.com](mailto:patrashantigopal@gmail.com); [dray@chem.iitkgp.ac.in](mailto:dray@chem.iitkgp.ac.in); Telephone: +91-3222283304

## Complexes:

1. [Cu(bipy)OH]<sub>2</sub>(NO<sub>3</sub>)<sub>2</sub>
2. [Cu(bipy)OH]<sub>2</sub>(ClO<sub>4</sub>)<sub>2</sub>
3. α-[Cu(dmaep)OH]<sub>2</sub>(ClO<sub>4</sub>)<sub>2</sub>
4. β-[Cu(dmaep)OH]<sub>2</sub>(ClO<sub>4</sub>)<sub>2</sub>
5. [Cu(eaep)OH]<sub>2</sub>(ClO<sub>4</sub>)<sub>2</sub>
6. [Cu(tmen)OH]<sub>2</sub>(ClO<sub>4</sub>)<sub>2</sub>
7. [Cu(tmen)OH]<sub>2</sub>Br<sub>2</sub>
8. [Cu(2miz)OH]<sub>2</sub>(ClO<sub>4</sub>)<sub>2</sub>.2H<sub>2</sub>O

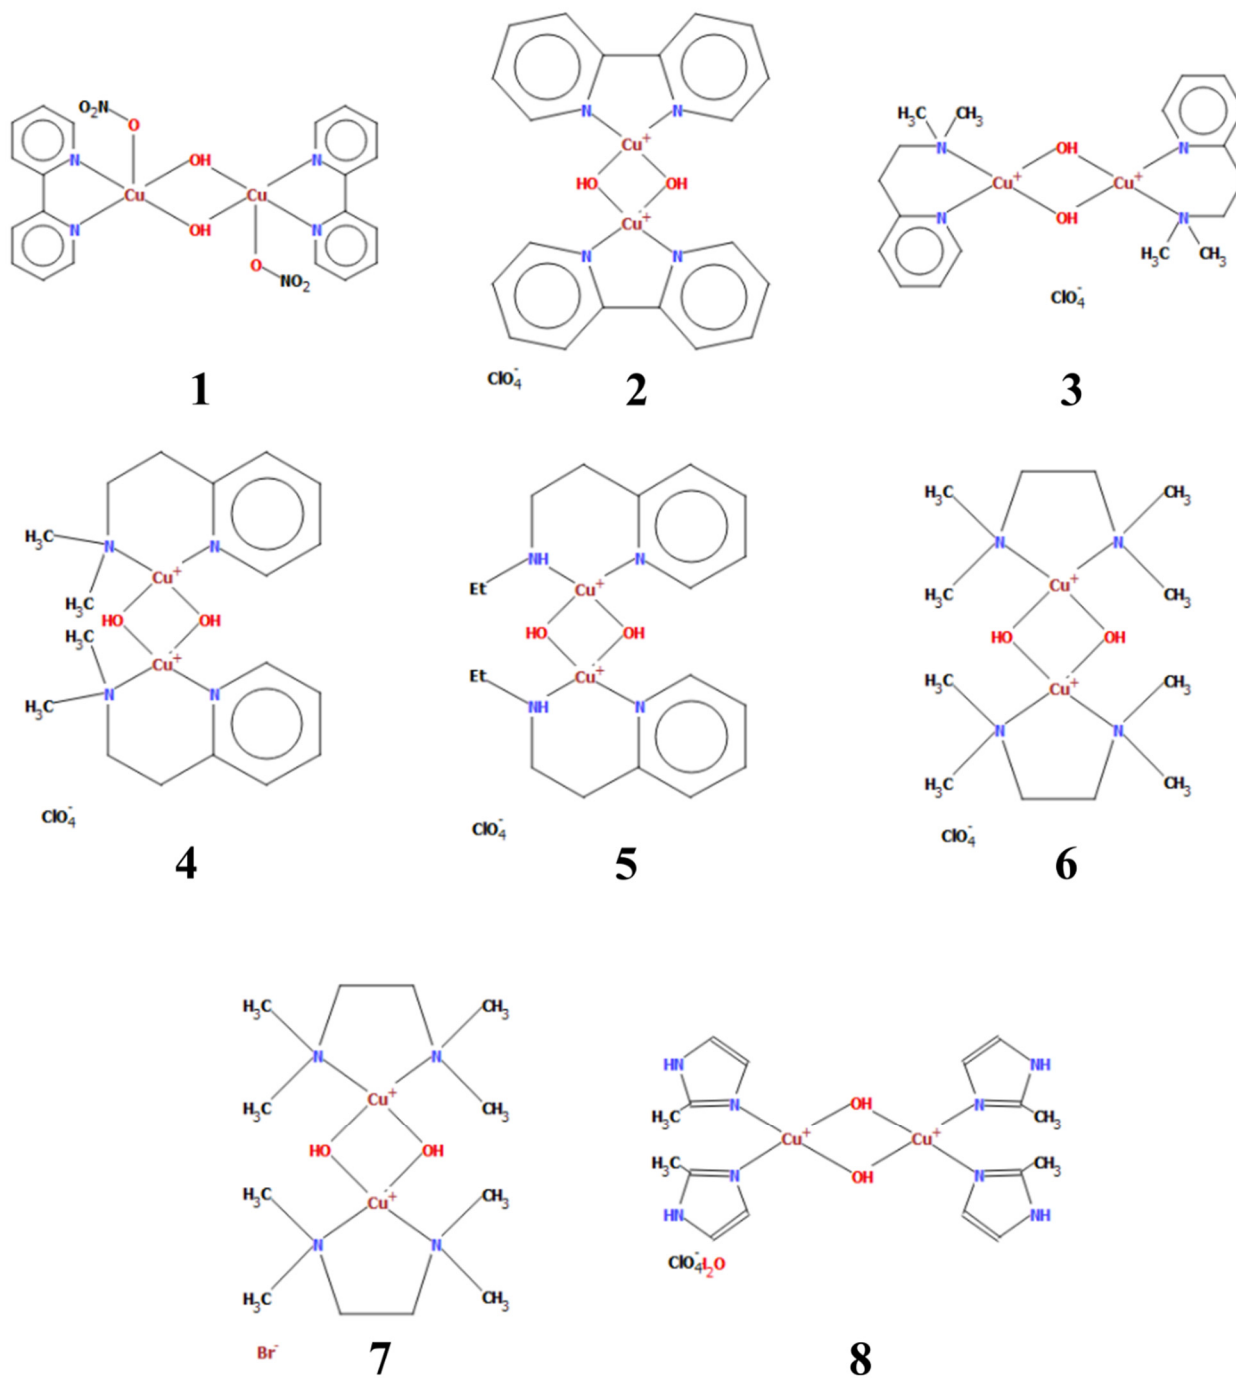

**Figure S1.** Molecular structures for Complex 1-8.

**Table S1.** Structural data from X-Ray crystallographic study.

|   | Complexes                                                                     | $2J$ (exp) | Cu-Cu | Cu-O           | Cu-N          | $\angle$ Cu-O-Cu | $\angle$ OH-Cu <sub>2</sub> O <sub>2</sub> |
|---|-------------------------------------------------------------------------------|------------|-------|----------------|---------------|------------------|--------------------------------------------|
| 1 | [Cu(bipy)OH] <sub>2</sub> (NO <sub>3</sub> ) <sub>2</sub>                     | 172        | 2.847 | 1.922          | 1.999         | 95.6             | 126                                        |
| 2 | [Cu(bipy)OH] <sub>2</sub> (ClO <sub>4</sub> ) <sub>2</sub>                    | 93         | 2.871 | 1.919          | 1.99          | 96.9             | 146.5                                      |
| 3 | $\alpha$ -[Cu(dmaep)OH] <sub>2</sub> (ClO <sub>4</sub> ) <sub>2</sub>         | -4.8       | 2.938 | 1.942          | 2.037         | 98.4             | 117.3                                      |
| 4 | $\beta$ -[Cu(dmaep)OH] <sub>2</sub> (ClO <sub>4</sub> ) <sub>2</sub>          | -201       | 2.935 | 1.91           | 2.035         | 100.4            | 139                                        |
| 5 | [Cu(eaep)OH] <sub>2</sub> (ClO <sub>4</sub> ) <sub>2</sub>                    | -130       | 2.917 | 1.929<br>1.904 | 1.99<br>2.027 | 99.8<br>99.5     | 125                                        |
| 6 | [Cu(tmen)OH] <sub>2</sub> (ClO <sub>4</sub> ) <sub>2</sub>                    | -360       | 2.966 | 1.929          | 2.014         | 101.6            |                                            |
| 7 | [Cu(tmen)OH] <sub>2</sub> Br <sub>2</sub>                                     | -509       | 3.000 | 1.902          | 2.03          | 104.1            |                                            |
| 8 | [Cu(2miz)OH] <sub>2</sub> (ClO <sub>4</sub> ) <sub>2</sub> .2H <sub>2</sub> O | -175       | 2.988 | 1.959          | 1.977         | 99.4             | 124.5                                      |

**Table S2.** Unit Cell data from Crystallographic study.

|   | Complexes                                                                     | a      | b      | c      | $\alpha$ | $\beta$ | $\gamma$ | Crystal System |
|---|-------------------------------------------------------------------------------|--------|--------|--------|----------|---------|----------|----------------|
| 1 | [Cu(bipy)OH] <sub>2</sub> (NO <sub>3</sub> ) <sub>2</sub>                     | 7.637  | 16.989 | 8.504  | 91.58    | 97.49   | 90.36    | Body Centred   |
| 2 | [Cu(bipy)OH] <sub>2</sub> (ClO <sub>4</sub> ) <sub>2</sub>                    | 13.600 | 15.210 | 6.270  | 90       | 113.6   | 90       | Monoclinic     |
| 3 | $\alpha$ -[Cu(dmaep)OH] <sub>2</sub> (ClO <sub>4</sub> ) <sub>2</sub>         | 9.164  | 10.049 | 8.953  | 82.3     | 56.73   | 68.52    | Triclinic      |
| 4 | $\beta$ -[Cu(dmaep)OH] <sub>2</sub> (ClO <sub>4</sub> ) <sub>2</sub>          | 7.266  | 16.500 | 10.851 | 90       | 82.43   | 90       | Monoclinic     |
| 5 | [Cu(eaep)OH] <sub>2</sub> (ClO <sub>4</sub> ) <sub>2</sub>                    | 9.195  | 19.290 | 7.679  | 90       | 77      | 90       | Monoclinic     |
| 6 | [Cu(tmen)OH] <sub>2</sub> (ClO <sub>4</sub> ) <sub>2</sub>                    | 7.707  | 14.996 | 11.627 | 90       | 109.13  | 90       | Monoclinic     |
| 7 | [Cu(tmen)OH] <sub>2</sub> Br <sub>2</sub>                                     | 17.072 | 18.482 | 12.825 | 90       | 90      | 90       | Orthorhombic   |
| 8 | [Cu(2miz)OH] <sub>2</sub> (ClO <sub>4</sub> ) <sub>2</sub> .2H <sub>2</sub> O | 14.93  | 13.725 | 7.481  | 90       | 103.4   | 90       | Monoclinic     |
